# Supplementary material for: Variable coordination geometries via an amine-tethered-enamidophosphinimine ligand on cobalt
Source: Royal Society of Chemistry journal article supplement (doi:10.1039/c7dt00930e), 2017-01-01
Supplement: c7dt00930e1.pdf [file c7dt00930e1.pdf]

## Electronic Supplementary Information

### Variable Coordination Geometries via an Amine-Enamidophosphinimine Ligand on Cobalt

Tatsuya Suzuki<sup>1</sup>, Hideki Masuda<sup>2\*</sup> and Michael D. Fryzuk<sup>1\*</sup>

<sup>1</sup>Department of Chemistry The University of British Columbia 2036 Main Mall  
Vancouver, BC, Canada V6T 1Z1

<sup>2</sup>Department of Frontier Materials, Graduate School of Engineering, Nagoya Institute of  
Technology, Gokiso, Showa, Nagoya, Japan 466-8555

#### Contents

|                                                                                                                                                                                   |     |
|-----------------------------------------------------------------------------------------------------------------------------------------------------------------------------------|-----|
| <b>Figure S1.</b> <sup>1</sup> H NMR spectrum of H(NNpN <sub>3</sub> <sup>DIPP</sup> ) <b>2</b> in benzene- <i>d</i> <sub>6</sub> .....                                           | S2  |
| <b>Figure S2.</b> <sup>31</sup> P NMR spectrum of H(NNpN <sub>3</sub> <sup>DIPP</sup> ) <b>2</b> in benzene- <i>d</i> <sub>6</sub> .....                                          | S2  |
| <b>Figure S3.</b> <sup>1</sup> H NMR spectrum of H(NNpN <sup>DIPP</sup> ) <b>3</b> in benzene- <i>d</i> <sub>6</sub> .....                                                        | S3  |
| <b>Figure S4.</b> <sup>31</sup> P NMR spectrum of H(NNpN <sup>DIPP</sup> ) <b>3</b> in benzene- <i>d</i> <sub>6</sub> .....                                                       | S3  |
| <b>Figure S5.</b> <sup>1</sup> H NMR spectrum of Li(NNpN <sup>DIPP</sup> ) <b>4</b> in benzene- <i>d</i> <sub>6</sub> .....                                                       | S4  |
| <b>Figure S6.</b> <sup>31</sup> P NMR spectrum of Li(NNpN <sup>DIPP</sup> ) <b>4</b> in benzene- <i>d</i> <sub>6</sub> .....                                                      | S4  |
| <b>Figure S7.</b> <sup>1</sup> H NMR spectrum of κ <sup>3</sup> -(NNpN <sup>DIPP</sup> )CoCl <b>5</b> in benzene- <i>d</i> <sub>6</sub> .....                                     | S5  |
| <b>Figure S8.</b> <sup>1</sup> H NMR spectrum of κ <sup>3</sup> -(NNpN <sup>DIPP</sup> )Co(CH <sub>2</sub> SiMe <sub>3</sub> ) <b>6</b> in benzene- <i>d</i> <sub>6</sub> .....   | S5  |
| <b>Figure S9.</b> <sup>1</sup> H NMR spectrum of [κ <sup>2</sup> -(NNpN <sup>DIPP</sup> )Co] <sub>2</sub> (μ-H) <sub>2</sub> <b>7</b> in benzene- <i>d</i> <sub>6</sub> .....     | S6  |
| <b>Figure S10.</b> <sup>1</sup> H NMR spectrum of κ <sup>2</sup> :η <sup>6</sup> -(NNpN <sup>DIPP</sup> )Co <b>8</b> in benzene- <i>d</i> <sub>6</sub> .....                      | S6  |
| <b>Figure S11.</b> <sup>1</sup> H NMR spectra of <b>8</b> in benzene- <i>d</i> <sub>6</sub> and in THF- <i>d</i> <sub>8</sub> .....                                               | S7  |
| <b>Table S1.</b> Crystallographic and structure refinement data for compounds <b>3</b> , <b>4</b> , <b>5</b> , <b>6</b> , <b>7</b> and <b>8</b> .....                             | S8  |
| <b>Figure S12.</b> ORTEP diagram of the other independent molecule of κ <sup>3</sup> -(NNpN <sup>DIPP</sup> )CoCl <b>5</b> .....                                                  | S8  |
| <b>Figure S13.</b> <sup>1</sup> H NMR spectrum of H(NNpN <sup>TMS</sup> ) <b>9</b> in benzene- <i>d</i> <sub>6</sub> .....                                                        | S9  |
| <b>Figure S14.</b> <sup>31</sup> P NMR spectrum of H(NNpN <sup>TMS</sup> ) <b>9</b> in benzene- <i>d</i> <sub>6</sub> .....                                                       | S9  |
| <b>Figure S15.</b> <sup>1</sup> H NMR spectrum of Li(NNpN <sup>TMS</sup> ) <b>10</b> in benzene- <i>d</i> <sub>6</sub> .....                                                      | S10 |
| <b>Figure S16.</b> <sup>31</sup> P NMR spectrum of Li(NNpN <sup>TMS</sup> ) <b>10</b> in benzene- <i>d</i> <sub>6</sub> .....                                                     | S10 |
| <b>Figure S17.</b> <sup>1</sup> H NMR spectrum of κ <sup>2</sup> -(NNpN <sup>TMS</sup> ) <sub>2</sub> Co <b>11</b> in benzene- <i>d</i> <sub>6</sub> .....                        | S11 |
| <b>Figure S18.</b> <sup>1</sup> H NMR spectrum of κ <sup>3</sup> -(NNpN <sup>TMS</sup> )CoCl <b>12</b> in benzene- <i>d</i> <sub>6</sub> .....                                    | S11 |
| <b>Figure S19.</b> <sup>1</sup> H NMR spectrum of κ <sup>3</sup> -(NNpN <sup>DIPP</sup> )Co(CH <sub>2</sub> SiMe <sub>3</sub> ) <b>13</b> in benzene- <i>d</i> <sub>6</sub> ..... | S12 |
| <b>Figure S20.</b> <sup>1</sup> H NMR spectrum of κ <sup>4</sup> -(NNpNSiMe <sub>2</sub> CH <sub>2</sub> )Co <b>14</b> in benzene- <i>d</i> <sub>6</sub> .....                    | S12 |
| <b>Table S2.</b> Crystallographic and structure refinement data for compounds <b>10</b> , <b>11</b> , <b>13</b> and <b>14</b> .....                                               | S13 |
| <b>Table S3.</b> Selected bond distances in the N1–C7–C11–P1–N2 backbone .....                                                                                                    | S14 |
| <b>X-ray Crystallographic Structure and Refinement Data</b> .....                                                                                                                 | S14 |

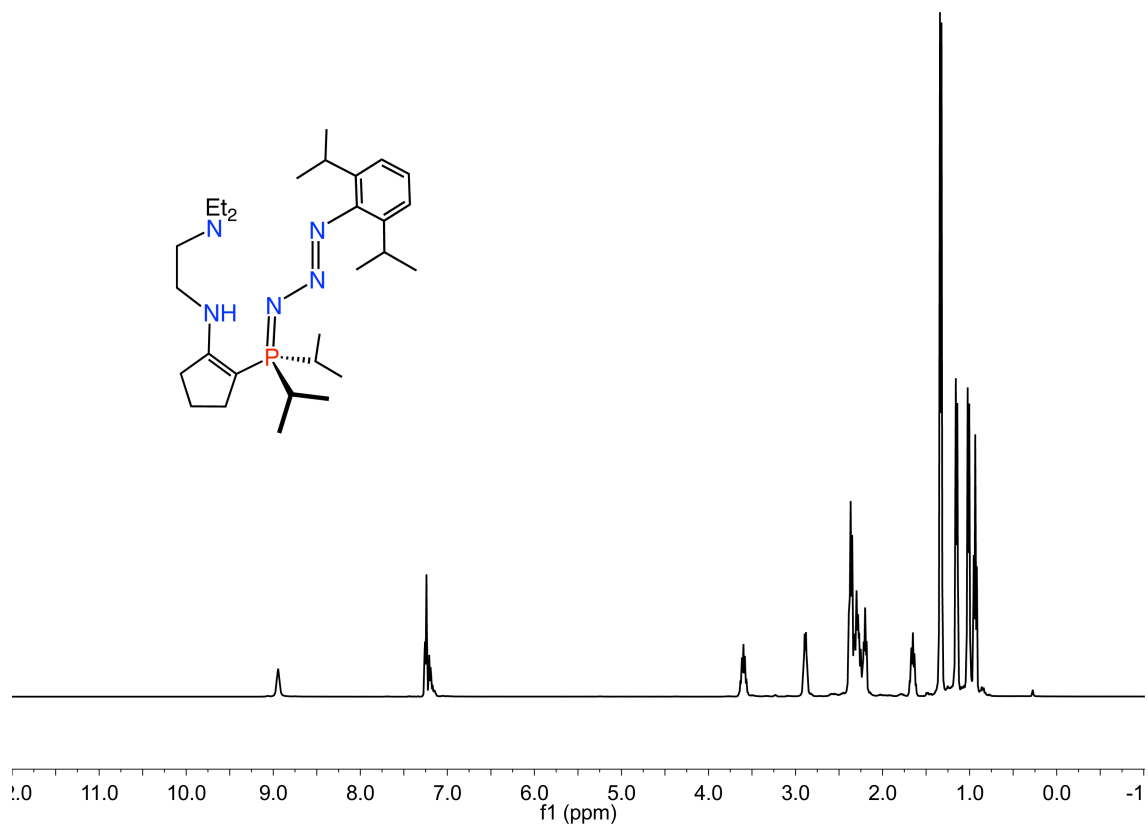

**Figure S1.**  $^1\text{H}$  NMR spectrum of **2** in benzene- $d_6$ .

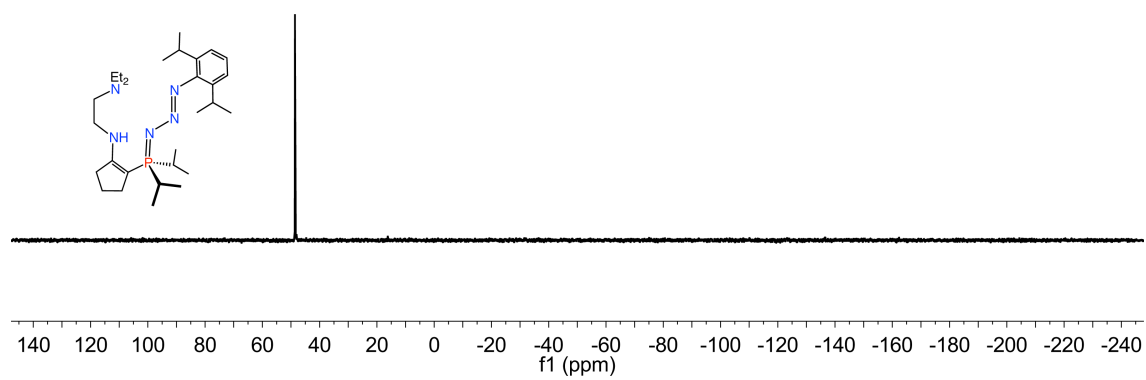

**Figure S2.**  $^{31}\text{P}$  NMR spectrum of **2** in benzene- $d_6$ .

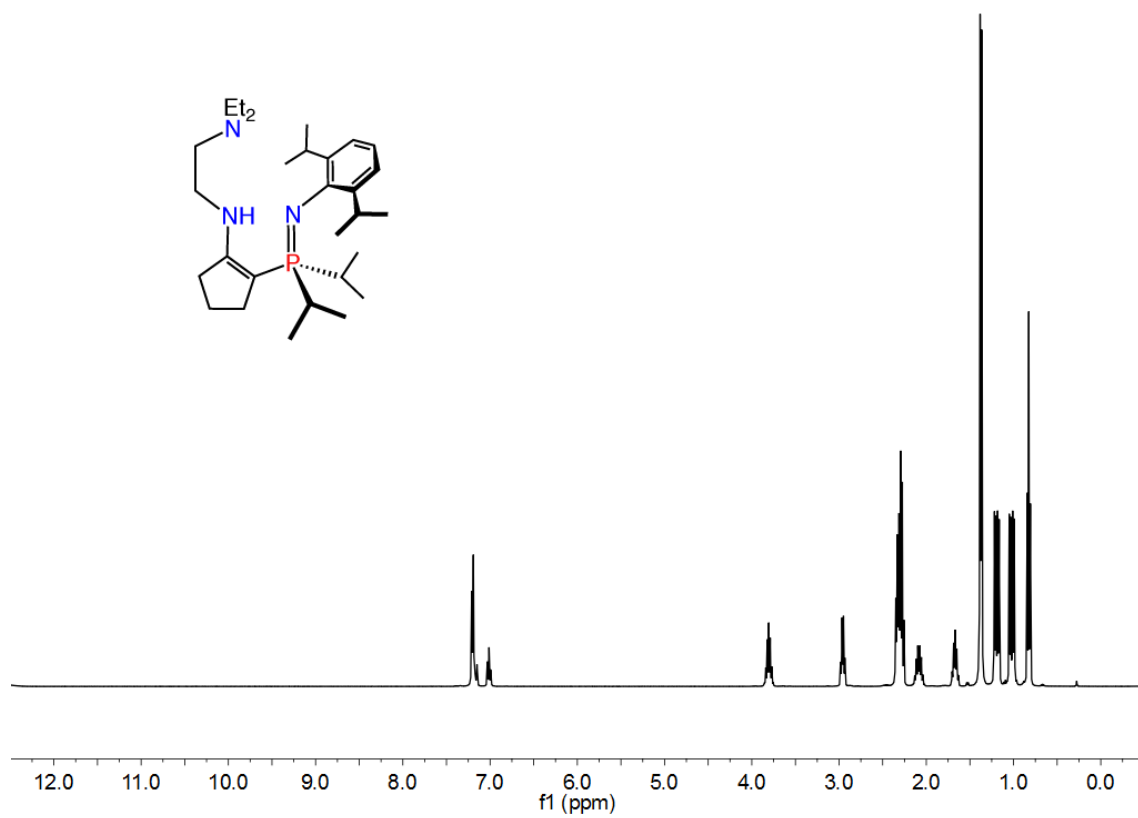

**Figure S3.**  $^1\text{H}$  NMR spectrum of **3** in benzene- $d_6$ .

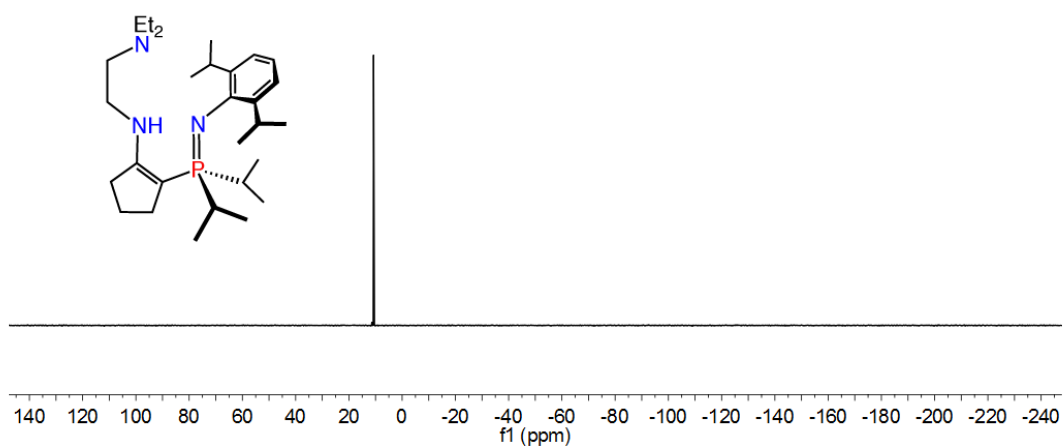

**Figure S4.**  $^{31}\text{P}$  NMR spectrum of **3** in benzene- $d_6$ .

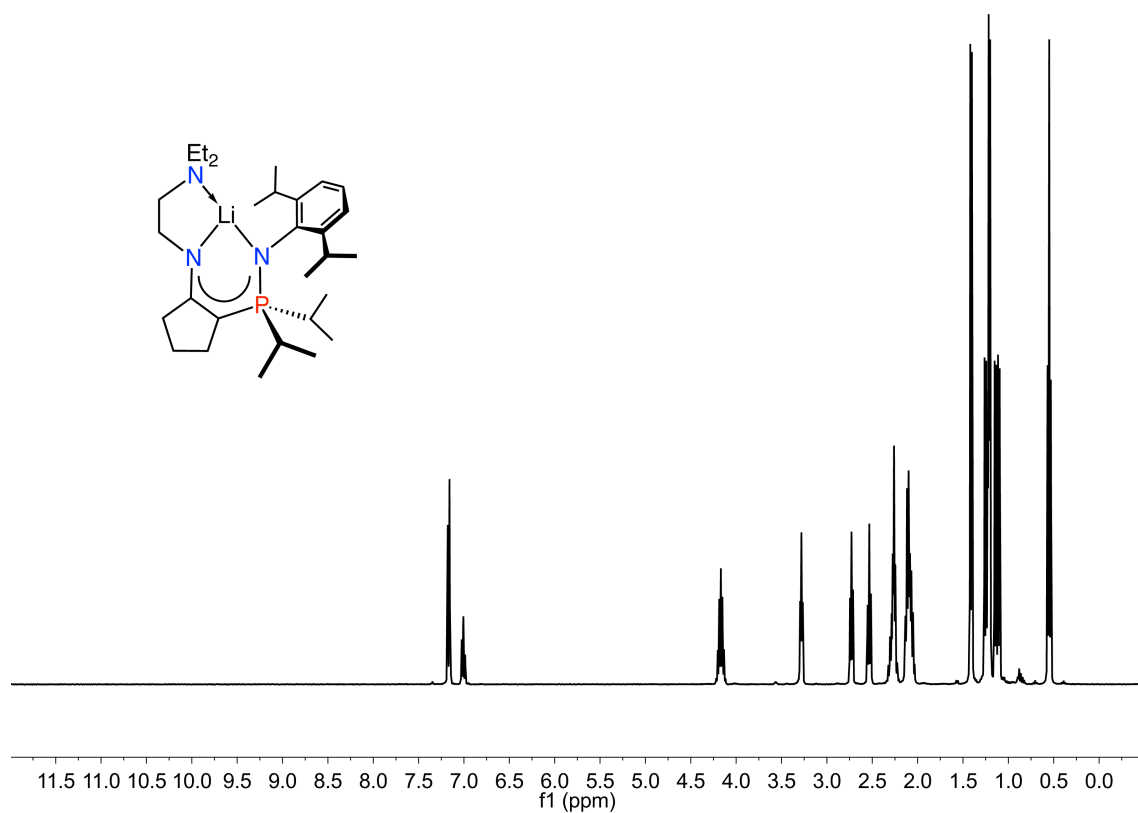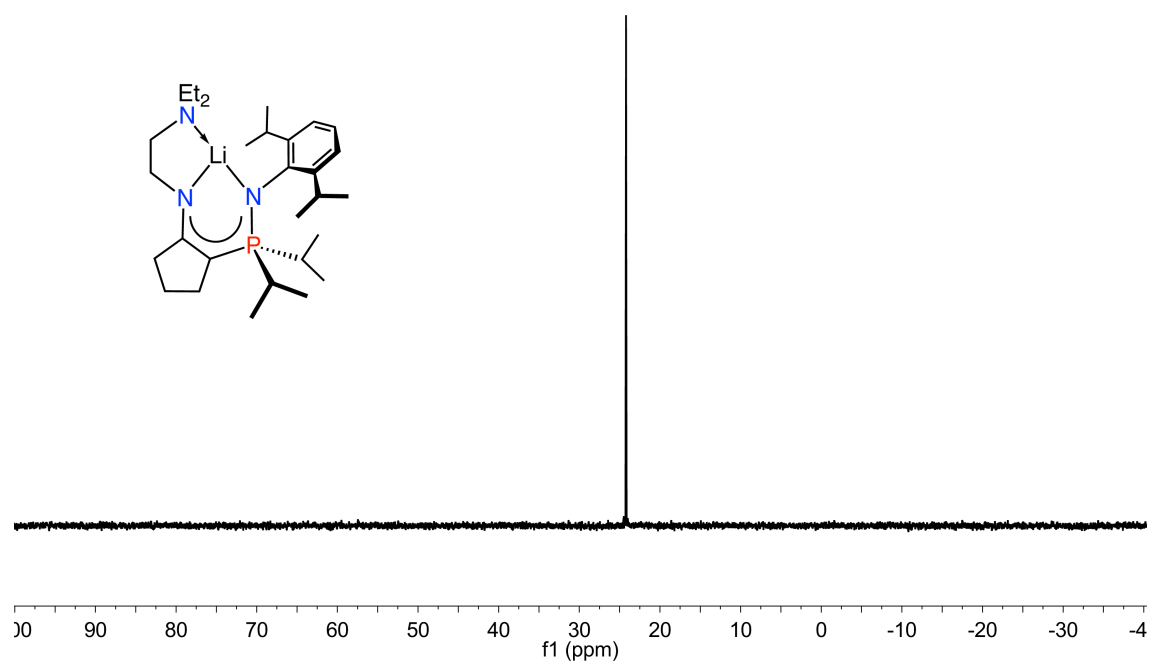

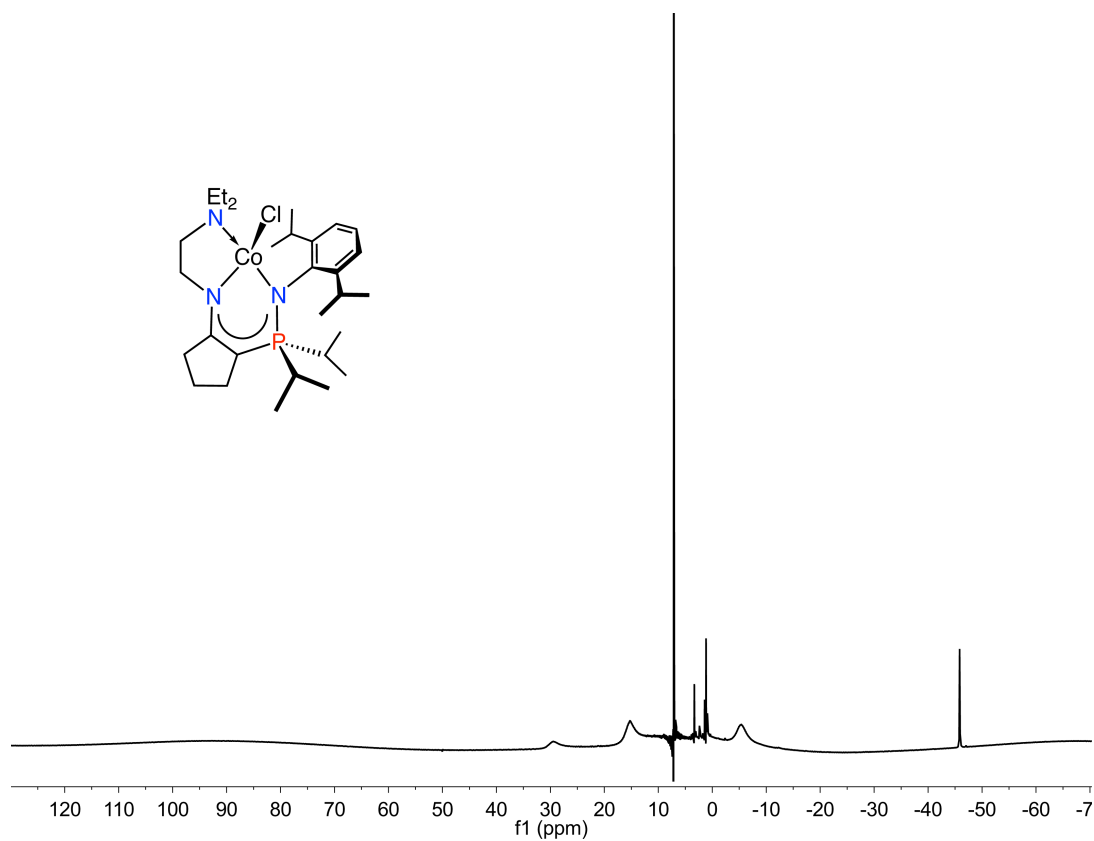

**Figure S7.** <sup>1</sup>H NMR spectrum of **5** in benzene-*d*<sub>6</sub>.

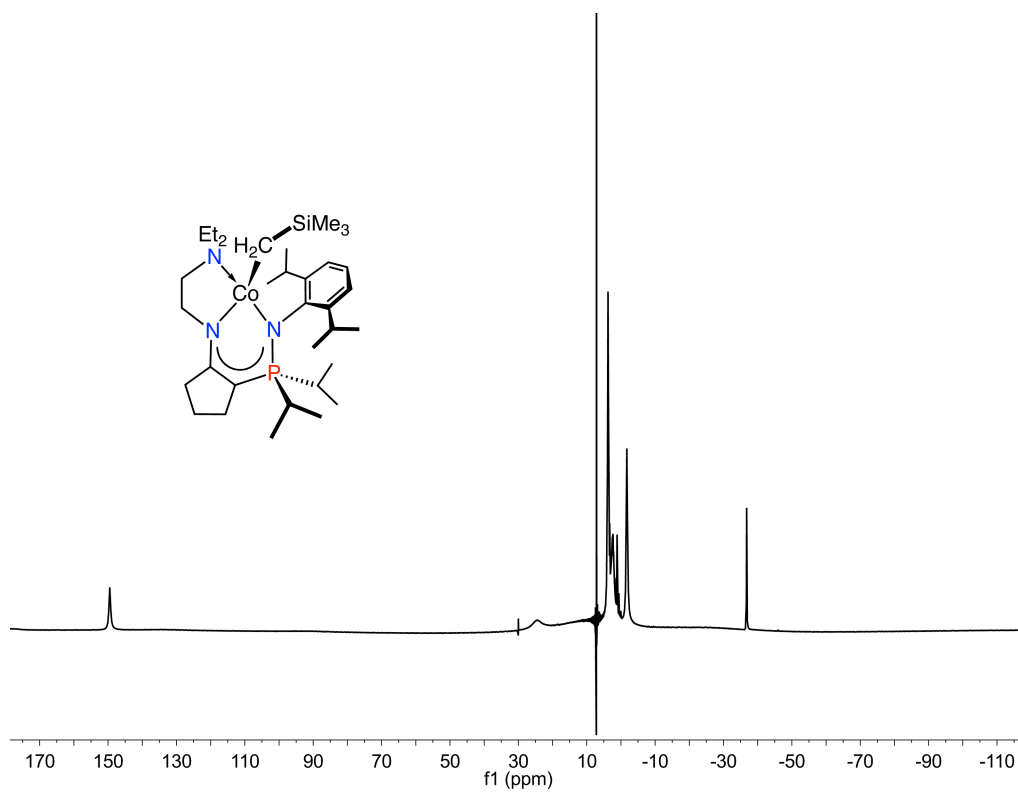

**Figure S8.** <sup>1</sup>H NMR spectrum of **6** in benzene-*d*<sub>6</sub>.

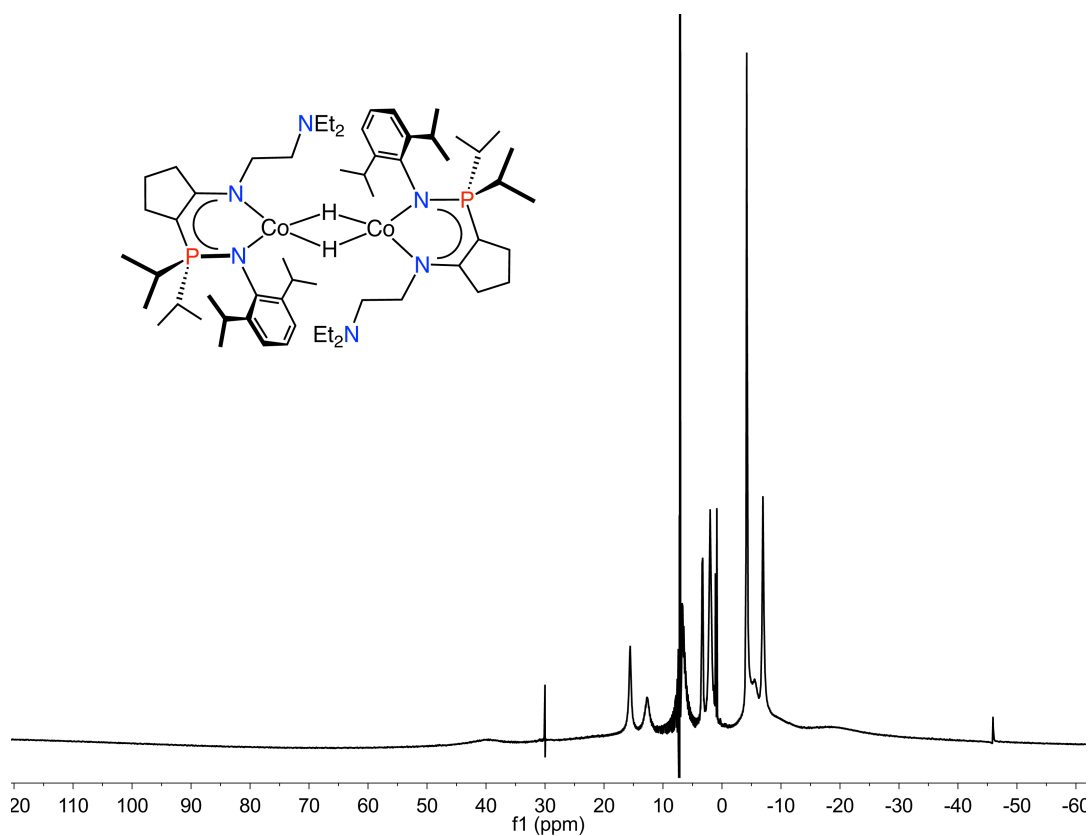

**Figure S9.** <sup>1</sup>H NMR spectrum of **7** in benzene-*d*<sub>6</sub>.

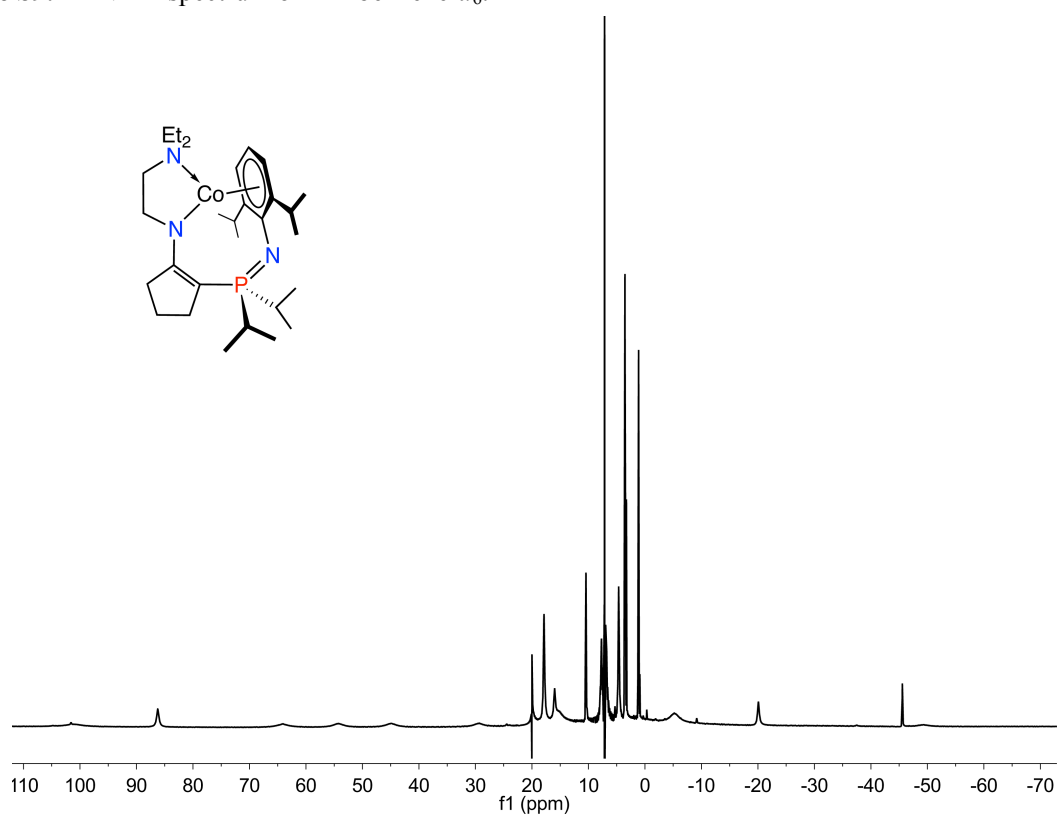

**Figure S10.** <sup>1</sup>H NMR spectrum of **8** in benzene-*d*<sub>6</sub>.

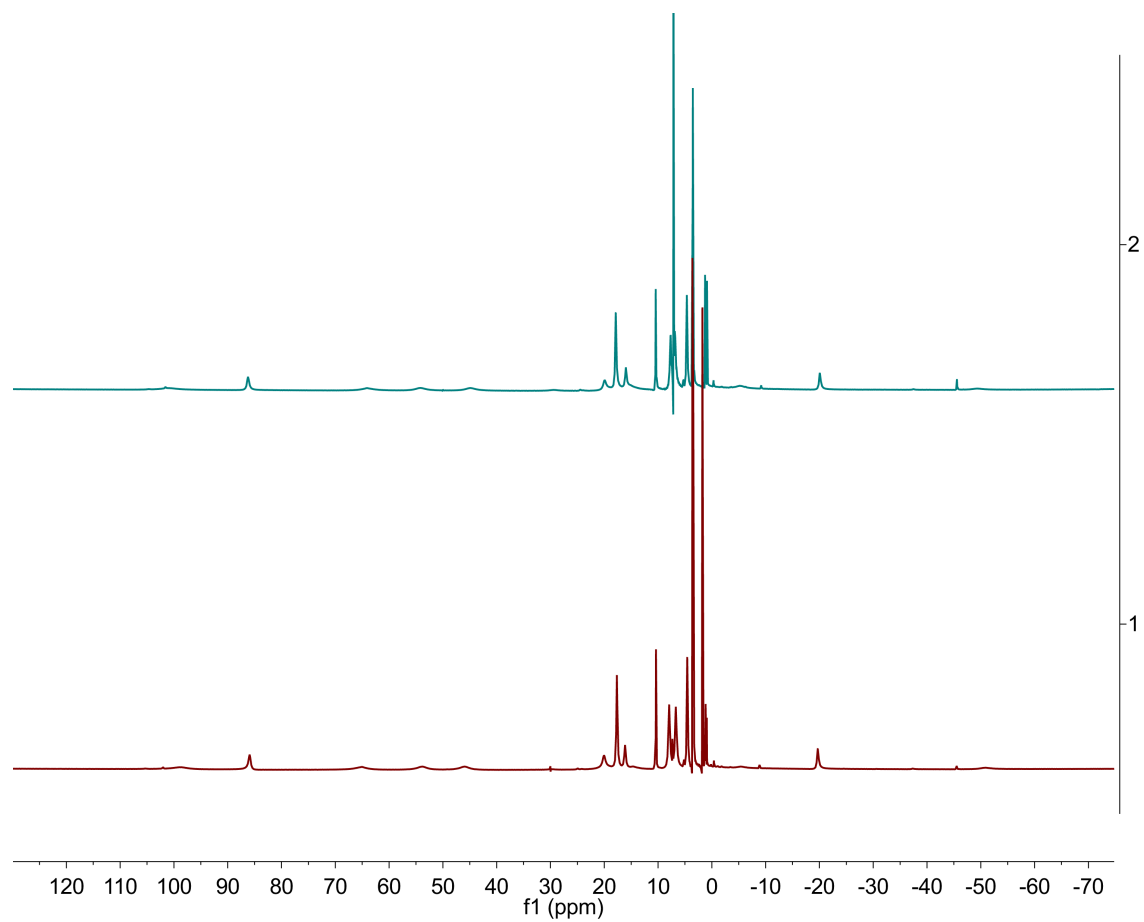

**Figure S11.** <sup>1</sup>H NMR spectra of **8** in benzene-*d*<sub>6</sub> (top) and in THF-*d*<sub>8</sub> (bottom).

**Table S1.** Crystallographic and structure refinement data for compounds **3**, **4**, **5**, **6**, **7** and **8**.

| Compound                                         | HNNpN <sup>DIPP</sup>                            | LiNNpN <sup>DIPP</sup>                             | $\kappa^3$ -(NNpN <sup>DIPP</sup> )CoCl                                                       | $[\kappa^2$ -(NNpN <sup>DIPP</sup> )Co] <sub>2</sub> ( $\mu$ -H) <sub>2</sub>  | $\kappa^3$ -(NNpN <sup>DIPP</sup> )Co(CH <sub>2</sub> SiMe <sub>3</sub> ) | $\kappa^2:\eta^6$ -(NNpN <sup>DIPP</sup> )Co       |
|--------------------------------------------------|--------------------------------------------------|----------------------------------------------------|-----------------------------------------------------------------------------------------------|--------------------------------------------------------------------------------|---------------------------------------------------------------------------|----------------------------------------------------|
| Chemical formula                                 | C <sub>29</sub> H <sub>52</sub> N <sub>3</sub> P | C <sub>29</sub> H <sub>51</sub> LiN <sub>3</sub> P | C <sub>29</sub> H <sub>51</sub> N <sub>3</sub> PCoCl<br>0.5(C <sub>4</sub> H <sub>10</sub> O) | C <sub>58</sub> H <sub>104</sub> Co <sub>2</sub> N <sub>6</sub> P <sub>2</sub> | C <sub>33</sub> H <sub>62</sub> CoN <sub>3</sub> PSi                      | C <sub>29</sub> H <sub>51</sub> CoN <sub>3</sub> P |
| Formula weight                                   | 473.70                                           | 479.63                                             | 604.13                                                                                        | 1065.33                                                                        | 618.15                                                                    | 529.61                                             |
| Temp (K)                                         | 90                                               | 90                                                 | 90                                                                                            | 90                                                                             | 90                                                                        | 90                                                 |
| Crystal system                                   | Monoclinic                                       | Monoclinic                                         | Triclinic                                                                                     | Monoclinic                                                                     | Monoclinic                                                                | Monoclinic                                         |
| Space group                                      | P2 <sub>1</sub> /n                               | P2 <sub>1</sub> /c                                 | P-1                                                                                           | C2/c                                                                           | P2 <sub>1</sub> /n                                                        | P2 <sub>1</sub> /c                                 |
| <i>a</i> / Å                                     | 11.2330(10)                                      | 13.8468(9)                                         | 12.7531(15)                                                                                   | 27.716(7)                                                                      | 9.9978(5)                                                                 | 15.0712(4)                                         |
| <i>b</i> / Å                                     | 17.5636(15)                                      | 13.3188(9)                                         | 15.1301(18)                                                                                   | 10.304(3)                                                                      | 20.9247(11)                                                               | 9.4570(3)                                          |
| <i>c</i> / Å                                     | 14.7023(13)                                      | 15.9724(11)                                        | 18.634(2)                                                                                     | 25.239(9)                                                                      | 16.7898(9)                                                                | 19.8154(5)                                         |
| $\alpha$ / °                                     |                                                  |                                                    | 105.750(6)                                                                                    |                                                                                |                                                                           |                                                    |
| $\beta$ / °                                      | 93.445(2)                                        | 95.626(4)                                          | 107.780(6)                                                                                    | 122.438(5)                                                                     | 93.751(2)                                                                 | 95.7230(10)                                        |
| $\gamma$ / °                                     |                                                  |                                                    | 90.106(6)                                                                                     |                                                                                |                                                                           |                                                    |
| <i>V</i> / Å <sup>3</sup>                        | 2895.4(4)                                        | 2931.5(3)                                          | 3281.1(7)                                                                                     | 6083(3)                                                                        | 3504(3)                                                                   | 2810(14)                                           |
| <i>Z</i>                                         | 4                                                | 4                                                  | 4                                                                                             | 4                                                                              | 4                                                                         | 4                                                  |
| <i>D</i> <sub>calc</sub> /g cm <sup>-3</sup>     | 1.087                                            | 1.084                                              | 1.223                                                                                         | 1.1632                                                                         | 1.173                                                                     | 1.252                                              |
| $\mu$ (Mo-K $\alpha$ ) / mm <sup>-1</sup>        | 0.115                                            | 0.114                                              | 0.678                                                                                         | 0.637                                                                          | 0.594                                                                     | 0.689                                              |
| <i>F</i> (000)                                   | 1048                                             | 1056                                               | 1304                                                                                          | 2316                                                                           | 1348                                                                      | 1144                                               |
| Reflections collected                            | 34799                                            | 85130                                              | 34822                                                                                         | 52628                                                                          | 28373                                                                     | 16600                                              |
| Independent reflections                          | 8522                                             | 11949                                              | 11225                                                                                         | 7013                                                                           | 7191                                                                      | 6244                                               |
| <i>R</i> (int)                                   | 0.0472                                           | 0.0383                                             | 0.0484                                                                                        | 0.0359                                                                         | 0.0468                                                                    | 0.0333                                             |
| <i>R</i> 1 ( <i>I</i> > 2 $\sigma$ ( <i>I</i> )) | 0.0405                                           | 0.0568                                             | 0.0885                                                                                        | 0.0284                                                                         | 0.0471                                                                    | 0.0349                                             |
| <i>R</i> 1 (all)                                 | 0.0575                                           | 0.0791                                             | 0.1090                                                                                        | 0.0348                                                                         | 0.0587                                                                    | 0.0449                                             |
| w <i>R</i> 2 (all)                               | 0.1044                                           | 0.1747                                             | 0.2446                                                                                        | 0.0745                                                                         | 0.1284                                                                    | 0.0846                                             |
| GOF                                              | 1.030                                            | 1.027                                              | 1.046                                                                                         | 1.050                                                                          | 1.067                                                                     | 1.048                                              |
| CCD number                                       | 1502794                                          | 1522303                                            | 1522304                                                                                       | 1522305                                                                        | 1502796                                                                   | 1502795                                            |

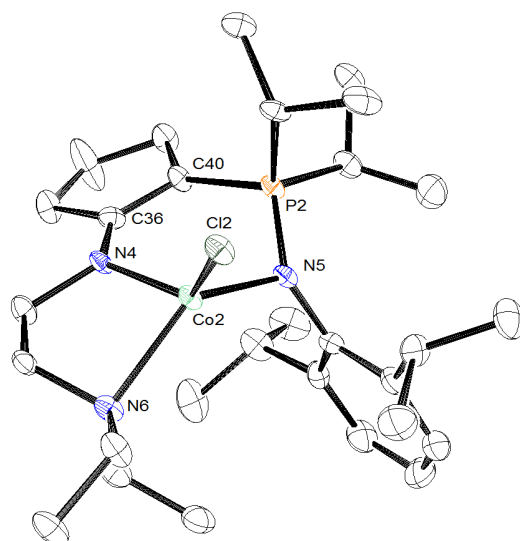**Figure S12.** ORTEP diagram of the other independent molecule of  $\kappa^3$ -(NNpN<sup>DIPP</sup>)CoCl **5**; selected bond lengths (Å) and bond angles (°): Co2–Cl2 2.2643(15), Co2–N6 2.163(5), Co2–N4 1.951(4), Co2–N5 2.021(5), P2–C40 1.754(6), C36–C40 1.384(8), N4–C36 1.350(7), N6–Co2–Cl2 101.40(13), N4–Co2–Cl2 127.93(15), N4–Co2–N6 84.70(19), N4–Co2–N5 98.01(19), N5–Co2–Cl2 112.13(14), N5–Co2–N6 133.62(19).



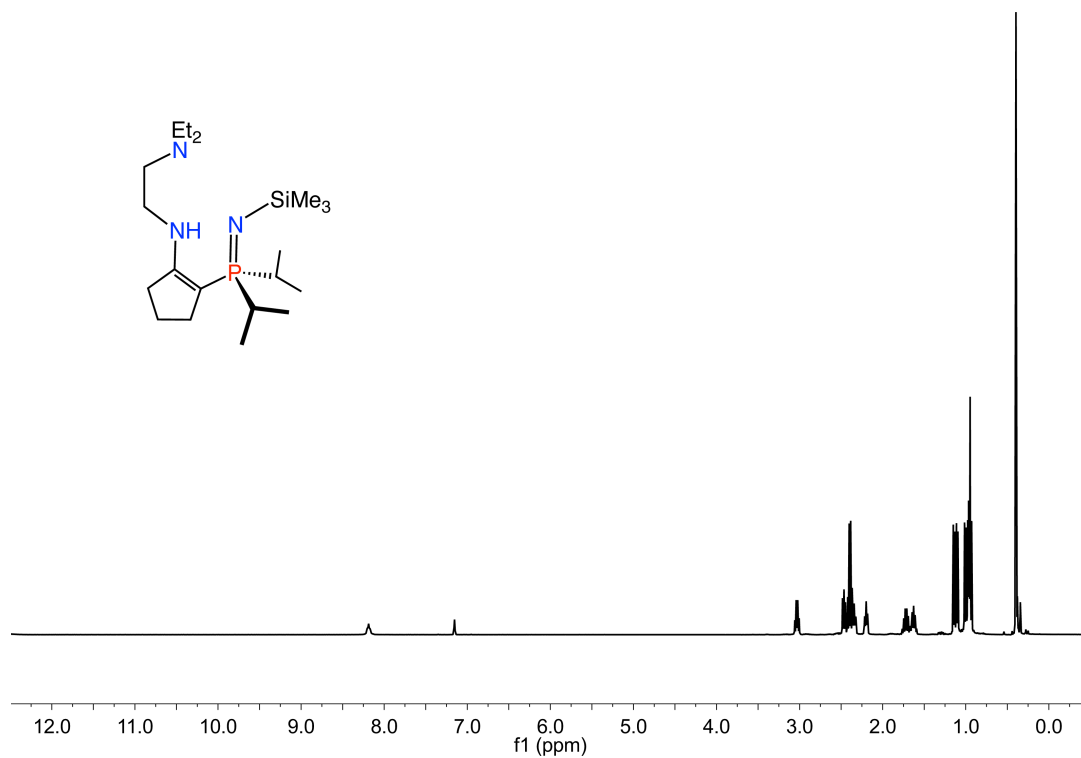

Figure S13.  $^1\text{H}$  NMR spectrum of **9** in benzene- $d_6$

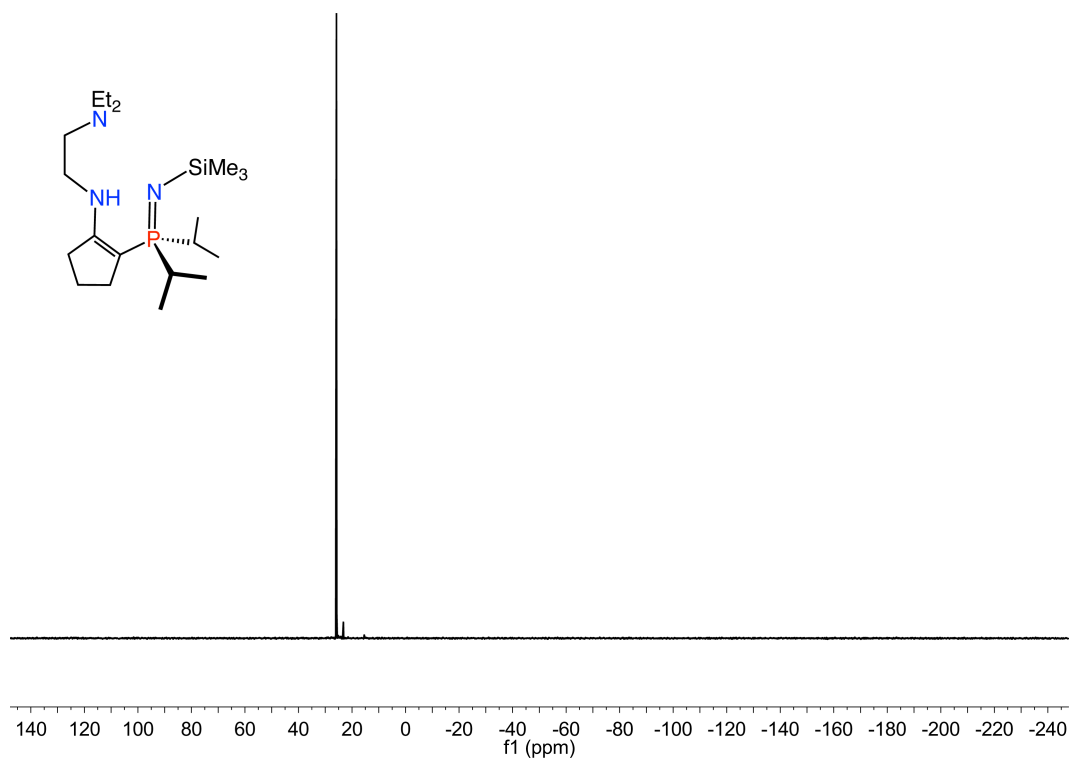

Figure S14.  $^{31}\text{P}$  NMR spectrum of **9** in benzene- $d_6$

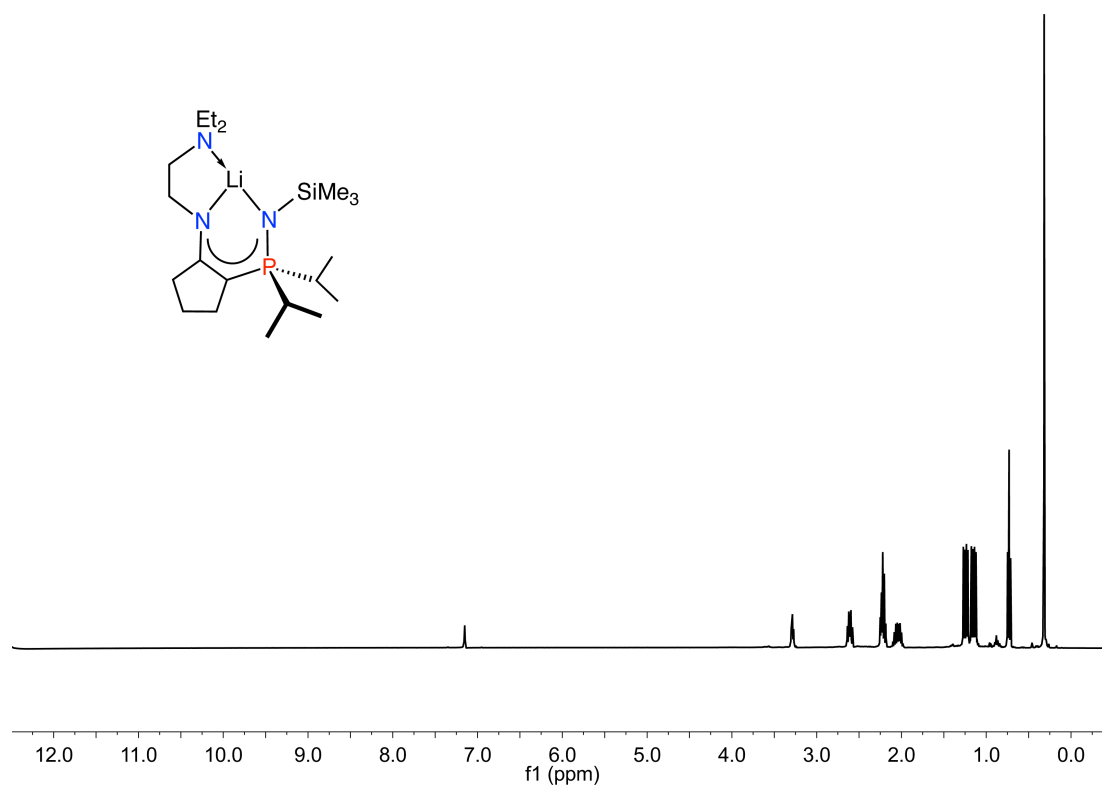

**Figure S15.**  $^1\text{H}$  NMR spectrum of **10** in benzene- $d_6$ .

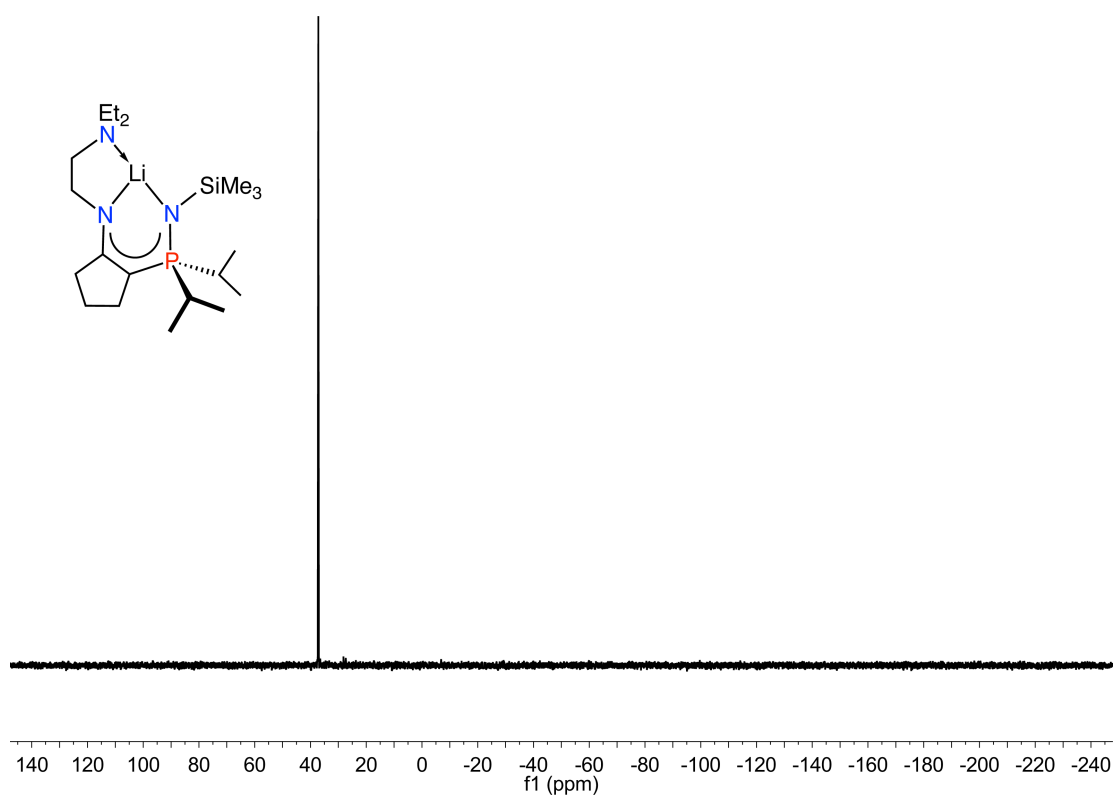

**Figure S16.**  $^{31}\text{P}$  NMR spectrum of **10** in benzene- $d_6$ .

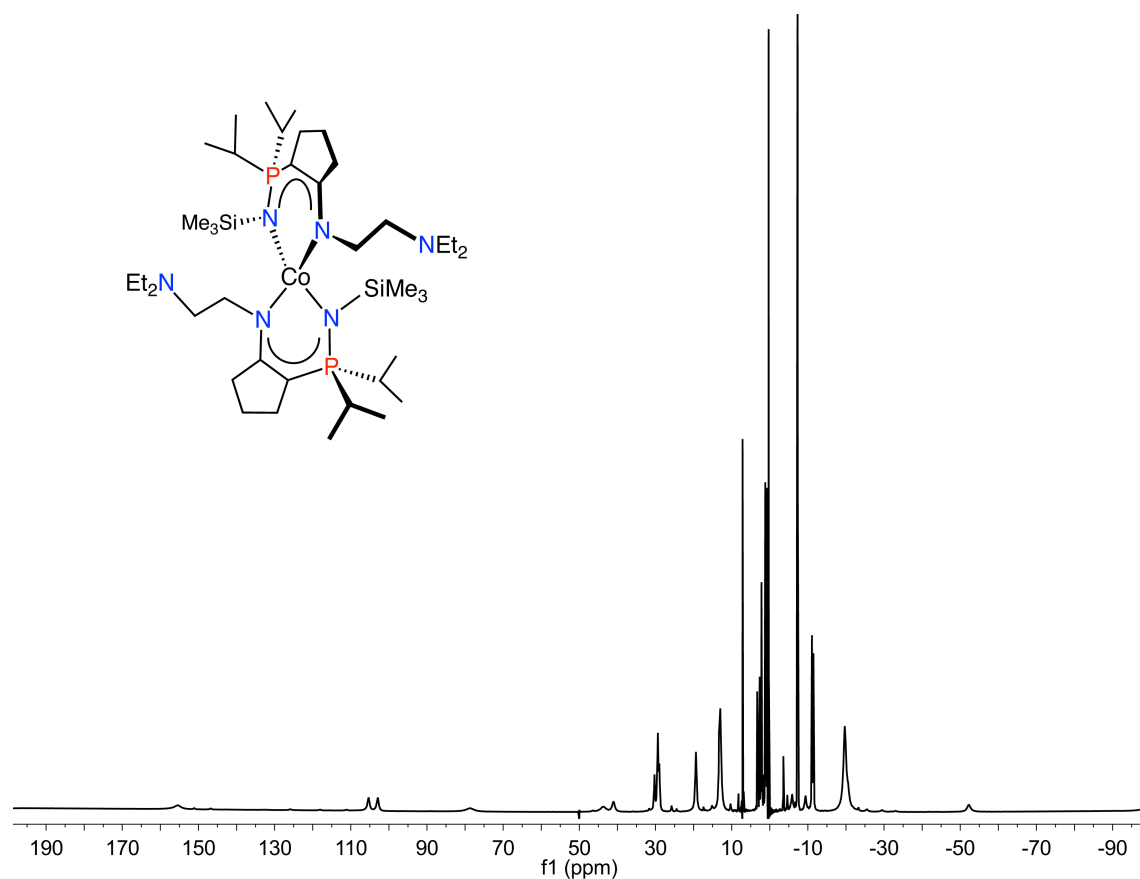

**Figure S17.**  $^1\text{H}$  NMR spectrum of **11** in benzene- $d_6$ .

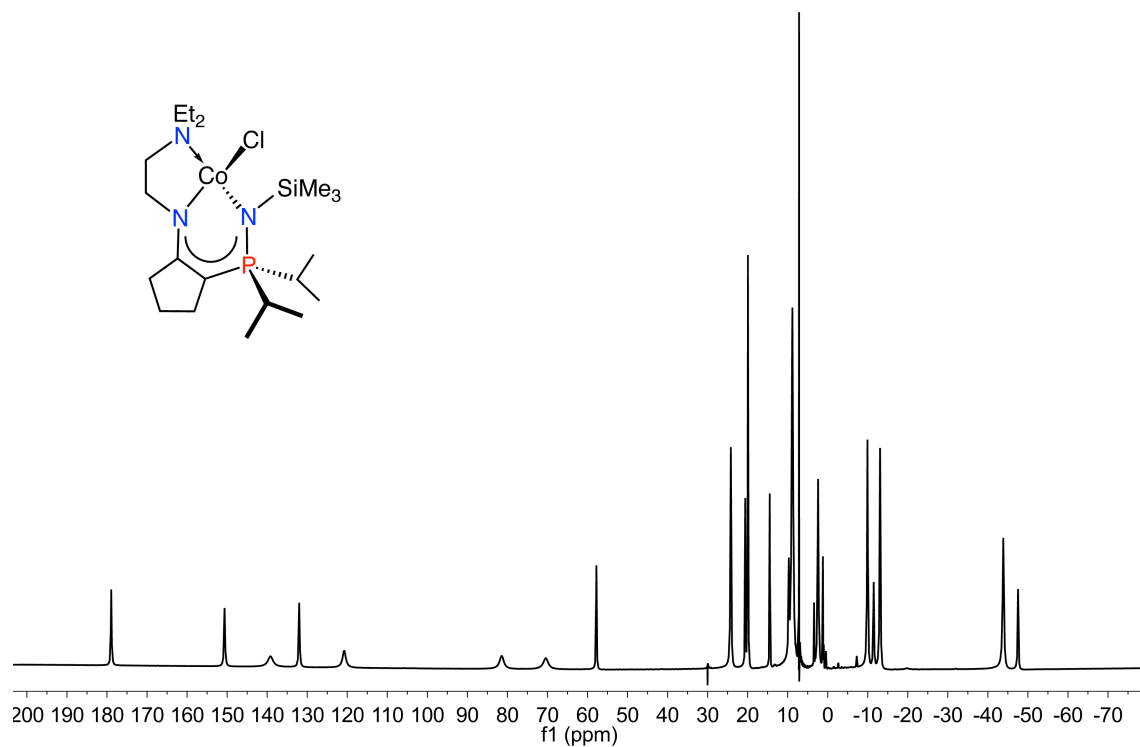

**Figure S18.**  $^1\text{H}$  NMR spectrum of **12** in benzene- $d_6$ . Because this complex is tetrahedral and asymmetric, one would expect 21 resonances; although we are unable to assign the peaks, the number of peaks approximates that predicted and so confirms the structure in solution.

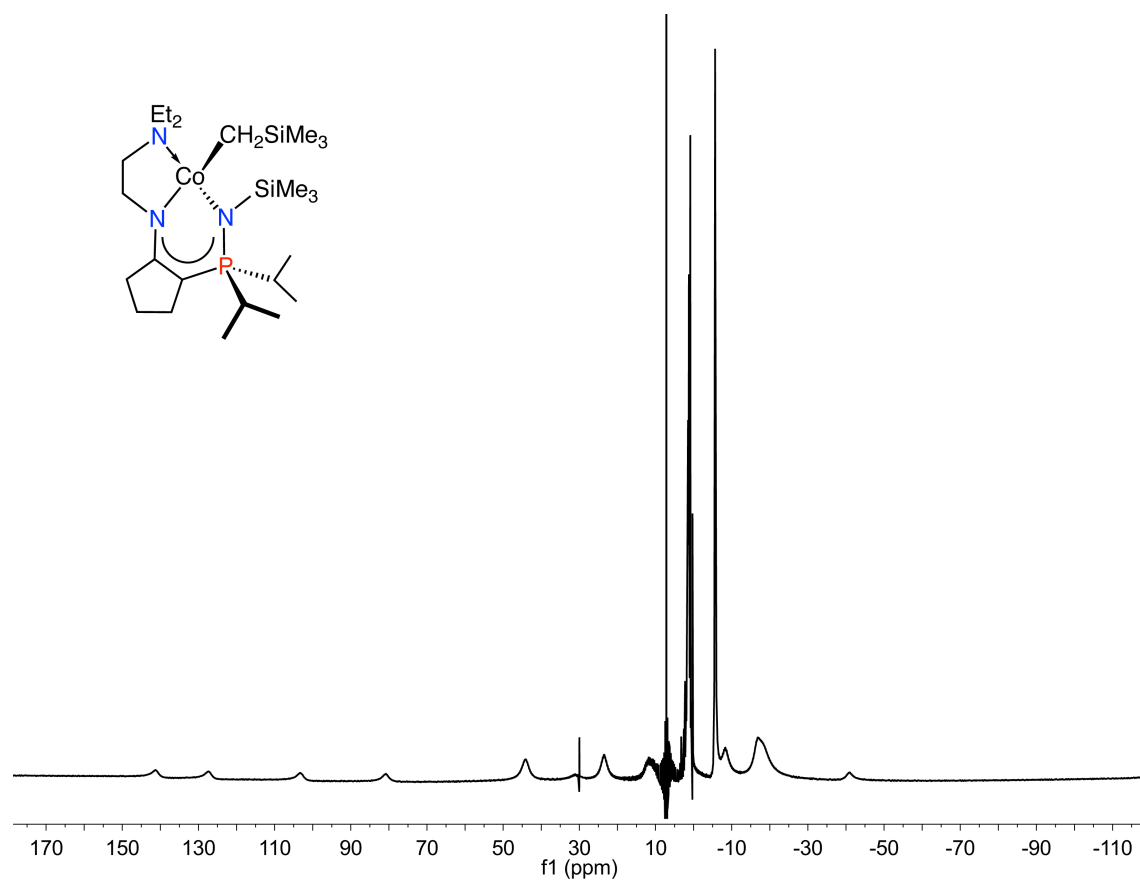

**Figure S19.**  $^1\text{H}$  NMR spectrum of **13** in benzene- $d_6$ .

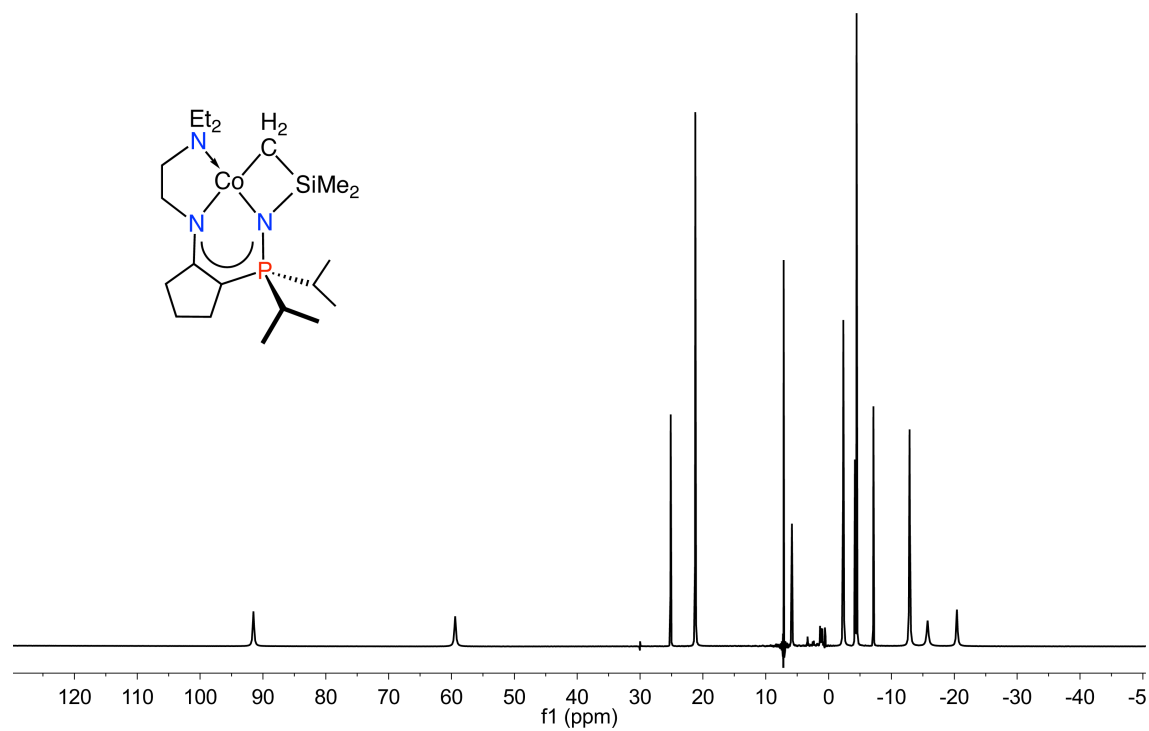

**Figure S20.**  $^1\text{H}$  NMR spectrum of **14** in benzene- $d_6$ . Because this complex is square planar, one would expect 12 distinct resonances; although we are unable to assign the peaks, the number of peaks approximates that predicted and so confirms the structure in solution.

**Table S2.** Crystallographic and structure refinement data for compounds **10**, **11**, **13** and **14**.

| Compound                                                | Li(NNpN <sup>TMS</sup> )                             | $\kappa^2$ -(NNpN <sup>TMS</sup> ) <sub>2</sub> Co                   | $\kappa^3$ -(NNpN <sup>TMS</sup> )Co(CH <sub>2</sub> SiMe <sub>3</sub> ) | $\kappa^4$ -(NNpNSiMe <sub>2</sub> CH <sub>2</sub> )Co |
|---------------------------------------------------------|------------------------------------------------------|----------------------------------------------------------------------|--------------------------------------------------------------------------|--------------------------------------------------------|
| Chemical formula                                        | C <sub>20</sub> H <sub>43</sub> LiN <sub>3</sub> PSi | C <sub>20</sub> H <sub>43</sub> Co <sub>0.5</sub> N <sub>3</sub> PSi | C <sub>24</sub> H <sub>54</sub> N <sub>3</sub> CoPSi <sub>2</sub>        | C <sub>20</sub> H <sub>42</sub> CoN <sub>3</sub> PSi   |
| Formula weight                                          | 391.58                                               | 414.10                                                               | 530.79                                                                   | 442.55                                                 |
| Temp (K)                                                | 90                                                   | 90                                                                   | 90                                                                       | 90                                                     |
| Crystal system                                          | Triclinic                                            | Monoclinic                                                           | Triclinic                                                                | Monoclinic                                             |
| Space group                                             | P-1                                                  | P2 <sub>1</sub> /c                                                   | P-1                                                                      | P2 <sub>1</sub> /c                                     |
| <i>a</i> / Å                                            | 8.9369(5)                                            | 18.6761(9)                                                           | 10.9373(5)                                                               | 12.8978(12)                                            |
| <i>b</i> / Å                                            | 10.3626(6)                                           | 10.0679(4)                                                           | 11.4001(5)                                                               | 10.1985(10)                                            |
| <i>c</i> / Å                                            | 13.9495(7)                                           | 25.3409(12)                                                          | 12.5228(6)                                                               | 18.5025(18)                                            |
| $\alpha$ / °                                            | 98.205(2)                                            |                                                                      | 81.580(2)                                                                |                                                        |
| $\beta$ / °                                             | 95.099(2)                                            | 96.5240(10)                                                          | 84.062(2)                                                                | 107.622(3)                                             |
| $\gamma$ / °                                            | 110.635(11)                                          |                                                                      | 80.956(2)                                                                |                                                        |
| <i>V</i> / Å <sup>3</sup>                               | 1182(11)                                             | 4734(4)                                                              | 1520.21(12)                                                              | 2319.6(4)                                              |
| <i>Z</i>                                                | 2                                                    | 8                                                                    | 2                                                                        | 4                                                      |
| <i>D</i> <sub>calc</sub> /g cm <sup>-3</sup>            | 1.0993                                               | 1.162                                                                | 1.1595                                                                   | 1.267                                                  |
| $\mu$ (Mo-K $\alpha$ ) / mm <sup>-1</sup>               | 0.175                                                | 0.514                                                                | 0.712                                                                    | 0.870                                                  |
| <i>F</i> (000)                                          | 432.5                                                | 1812                                                                 | 579.4                                                                    | 956                                                    |
| Reflections collected                                   | 18376                                                | 113854                                                               | 40788                                                                    | 72213                                                  |
| Independent reflections                                 | 4835                                                 | 28474                                                                | 9904                                                                     | 17933                                                  |
| <i>R</i> (int)                                          | 0.0276                                               | 0.0740                                                               | 0.0549                                                                   | 0.0555                                                 |
| <i>R</i> <i>I</i> ( <i>I</i> > 2 $\sigma$ ( <i>I</i> )) | 0.0295                                               | 0.0446                                                               | 0.0367                                                                   | 0.0357                                                 |
| <i>R</i> <i>I</i> (all)                                 | 0.0329                                               | 0.0858                                                               | 0.0549                                                                   | 0.0617                                                 |
| w <i>R</i> 2 (all)                                      | 0.0785                                               | 0.1133                                                               | 0.0881                                                                   | 0.0871                                                 |
| GOF                                                     | 1.036                                                | 1.030                                                                | 1.025                                                                    | 1.018                                                  |
| CCD number                                              | 1522306                                              | 1522309                                                              | 1522307                                                                  | 1522308                                                |

**Table S3.** Selected bond distances in the N1–C7–C11–P1–N2 ligand backbone for the indicated complexes

|        | 3          | 4          | 5                    | 6          | 7          | 8          | 10         | 11                       | 13         | 14         |
|--------|------------|------------|----------------------|------------|------------|------------|------------|--------------------------|------------|------------|
| N1–C7  | 1.3611(15) | 1.3228(17) | 1.350(7)<br>1.345(8) | 1.337(3)   | 1.3405(18) | 1.359(2)   | 1.3259(15) | 1.3349(13)<br>1.3497(13) | 1.3328(18) | 1.3381(9)  |
| C7–C11 | 1.3623(16) | 1.4050(16) | 1.384(8)<br>1.396(8) | 1.384(3)   | 1.390(2)   | 1.379(2)   | 1.4003(16) | 1.3924(15)<br>1.3827(15) | 1.3842(19) | 1.3880(10) |
| C11–P1 | 1.7783(12) | 1.7544(12) | 1.754(6)<br>1.755(6) | 1.763(2)   | 1.7498(15) | 1.7714(17) | 1.7552(12) | 1.7439(11)<br>1.7563(11) | 1.7584(14) | 1.7382(8)  |
| P1–N2  | 1.5626(10) | 1.6093(11) | 1.624(5)<br>1.627(5) | 1.6271(19) | 1.6195(11) | 1.5820(15) | 1.5994(10) | 1.6181(9)<br>1.6202(9)   | 1.6137(12) | 1.5940(6)  |

### X-ray Crystallographic Structure and Refinement Data

Single crystal X-ray diffraction data was collected on a Bruker (X8 or DUO) Apex II diffractometer equipped with a graphite (X8) or TRIUMPH (DUO) monochromator, using Mo K $\alpha$  radiation ( $\lambda = 0.71073$  Å), and integrated using the Bruker SAINT software package.<sup>1</sup> Suitable single crystals were selected, coated in Fomblin oil and mounted on a glass fiber. All absorption corrections were performed using the multi-scan technique (SADABS).<sup>2</sup> Structures were solved by direct methods and refined using the SHELXL<sup>3</sup> and OLEX2<sup>4</sup> software packages. All non-hydrogen atoms were refined anisotropically unless otherwise noted. All hydrogen atoms were placed in calculated positions and assigned to an isotropic displacement parameter, unless otherwise noted; hydrogen atoms so specified were located in the difference map and were refined isotropically.

(1) SAINT. Version 7.03A. Bruker AXS Inc. Madison, Wisconsin, USA (1997-2003).

(2) SADABS. Bruker Nonius area detector scaling and absorption correction - V2.10. Bruker AXS Inc. Madison, Wisconsin, USA (2003).

(3) G. Sheldrick, *Acta Crystallogr. A* **2008**, *64*, 112.

(4) O.V. Dolomanov, L.J. Bourhis, R.J. Gildea, J.A.K. Howard, H. Puschmann, *J. Appl. Cryst.* **2009**, *42*, 229.
